# Supplementary material for: Living with Lions: The Economics of Coexistence in the Gir Forests, India
Source: PLOS journal article supplement (doi:10.1371/journal.pone.0049457), 2013-01-16
Supplement: S1 (10.1371/journal.pone.0049457.s001) [file journal.pone.0049457.s001]

Table S1 Average monetary values (Indian Rupees ₹, 1 US\$ ~ ₹ 50 ) for various age-sex-productivity categories of livestock (buffalo and cattle) used for analysis. The values in parentheses show the compensations amounts paid by the state forest department for the respective livestock classes to offset economic loss due to predation by carnivores in and around the Gir Protected Area (after [82])

|         | Male<br>calf   | Female<br>calf   | Juvenile<br>male | Juvenile<br>female | Sub-<br>adult<br>male | Sub-<br>adult<br>female | Milk<br>yielding<br>adult<br>female | Dry<br>productive<br>adult<br>female | Non-<br>productive<br>adult<br>female | Adult<br>male    | Non-<br>productive<br>adult male |
|---------|----------------|------------------|------------------|--------------------|-----------------------|-------------------------|-------------------------------------|--------------------------------------|---------------------------------------|------------------|----------------------------------|
| Buffalo | 800<br>(1,100) | 1,000<br>(1,500) | 1,200<br>(1,100) | 2,500<br>(1,500)   | 3,500<br>(3,500)      | 4,000<br>(2,100)        | 15,000<br>(8,000)                   | 10,000<br>(2,100)                    | 4,000<br>(1,100)                      | 5,000<br>(3,500) | 3,000<br>(1,100)                 |
| Cattle  | 500<br>(1,100) | 800<br>(1,100)   | 500<br>(1,100)   | 1,200<br>(1,100)   | 2,000<br>(3,500)      | 3,500<br>(2,100)        | 8,000<br>(6,000)                    | 5,000<br>(1,100)                     | 1000<br>(1,100)                       | 8,000<br>(6,000) | 500<br>(1,100)                   |
